# Supplementary material
Source: PubMed Central journal article supplement (PMC3475753)
Supplement: NIHMS380917-supplement-01.pdf [file NIHMS380917-supplement-01.pdf]

**Table 1: Characteristics of eyes with uveitis and hypotony (<5 mmHg vs 5+ mmHg) at presentation**

|                                 |                                          | Intraocular Pressures |                   |                    | Univariate                                 |         | Multivariate*                              |         |
|---------------------------------|------------------------------------------|-----------------------|-------------------|--------------------|--------------------------------------------|---------|--------------------------------------------|---------|
|                                 |                                          | <5 mmHg<br>n=189      | 5-7 mmHg<br>n=196 | >7 mmHg<br>n=10734 | Odds Ratio<br>(95% Confidence<br>Interval) | p-value | Odds Ratio<br>(95% Confidence<br>Interval) | p-value |
| Age                             | <18                                      | 28.30%                | 27.80%            | 16.20%             | 2.26 (1.43 - 3.58)                         | <.001   | 1.06 (0.52 - 2.17)                         | 0.63    |
|                                 | 18-25                                    | 10.90%                | 12.90%            | 12.40%             | 1.17 (0.65 - 2.11)                         |         | 0.78 (0.35 - 1.73)                         |         |
|                                 | 26-35                                    | 17.90%                | 19.10%            | 20.90%             | Reference                                  |         | Reference                                  |         |
|                                 | 36-45                                    | 19.00%                | 18.60%            | 19.60%             | 1.22 (0.74 - 2.02)                         |         | 1.19 (0.67 - 2.14)                         |         |
|                                 | 46-55                                    | 9.80%                 | 11.30%            | 14.80%             | 0.82 (0.46 - 1.45)                         |         | 0.59 (0.27 - 1.32)                         |         |
|                                 | 56-65                                    | 3.80%                 | 3.60%             | 8.60%              | 0.52 (0.22 - 1.22)                         |         | 0.69 (0.26 - 1.83)                         |         |
|                                 | >65                                      | 10.30%                | 6.70%             | 7.50%              | 1.58 (0.87 - 2.88)                         |         | 0.77 (0.31 - 1.92)                         |         |
| Gender                          | Female                                   | 67.20%                | 60.70%            | 64.10%             | Reference                                  | 0.53    | Reference                                  | 0.94    |
|                                 | Male                                     | 32.80%                | 39.30%            | 35.90%             | 0.90 (0.66 - 1.24)                         |         | 0.98 (0.63 - 1.53)                         |         |
| Race                            | White                                    | 56.60%                | 56.10%            | 72.10%             | Reference                                  | <.001   | Reference                                  | 0.14    |
|                                 | African-derived                          | 32.30%                | 28.10%            | 15.70%             | 2.69 (1.93 - 3.75)                         |         | 1.58 (0.94 - 2.67)                         |         |
|                                 | Other                                    | 11.10%                | 15.80%            | 12.20%             | 1.36 (0.84 - 2.21)                         |         | 1.55 (0.82 - 2.94)                         |         |
| Contralateral uveitis           | Yes                                      | 89.40%                | 78.10%            | 82.60%             | Reference                                  | 0.02    | Reference                                  | 0.31    |
|                                 | No                                       | 10.60%                | 21.90%            | 17.40%             | 0.61 (0.40 - 0.92)                         |         | 0.72 (0.39 - 1.35)                         |         |
| Hypertension                    | No                                       | 73.00%                | 84.20%            | 82.80%             | Reference                                  | 0.03    | Reference                                  | 0.41    |
|                                 | Yes                                      | 27.00%                | 15.80%            | 17.20%             | 1.48 (1.04 - 2.10)                         |         | 0.80 (0.46 - 1.37)                         |         |
| Diabetes                        | No                                       | 89.40%                | 94.90%            | 94.80%             | Reference                                  | 0.002   | Reference                                  | 0.27    |
|                                 | Yes                                      | 10.60%                | 5.10%             | 5.20%              | 2.16 (1.34 - 3.48)                         |         | 1.50 (0.73 - 3.08)                         |         |
| Systemic diseases               | Any†                                     | 36.50%                | 34.70%            | 24.10%             | 1.80 (1.31 - 2.47)                         | <.001   | 0.94 (0.49 - 1.78)                         | 0.84    |
|                                 | HLA-B27 and/or spondyloarthropathy       | 6.30%                 | 12.20%            | 10.40%             | 0.55 (0.30 - 1.02)                         | 0.06    | 0.70 (0.31 - 1.57)                         | 0.39    |
|                                 | Juvenile idiopathic arthritis            | 18.00%                | 15.30%            | 5.00%              | 4.39 (2.95 - 6.55)                         | <.001   | 1.91 (0.93 - 3.92)                         | 0.08    |
|                                 | Sarcoidosis                              | 11.60%                | 9.20%             | 7.10%              | 1.68 (1.03 - 2.76)                         | 0.04    | 1.83 (0.95 - 3.53)                         | 0.07    |
| Type of uveitis                 | Anterior Uveitis                         | 56.60%                | 59.70%            | 54.10%             | Reference                                  | <.001   | Reference                                  | 0.04    |
|                                 | Intermediate Uveitis                     | 2.60%                 | 12.80%            | 17.30%             | 0.27 (0.13 - 0.56)                         |         | 0.35 (0.14 - 0.84)                         |         |
|                                 | Panuveitis                               | 34.40%                | 20.90%            | 11.60%             | 2.61 (1.86 - 3.67)                         |         | 1.20 (0.72 - 2.00)                         |         |
|                                 | Posterior Uveitis                        | 6.30%                 | 6.60%             | 17.00%             | 0.38 (0.21 - 0.69)                         |         | 0.57 (0.28 - 1.14)                         |         |
| Visual Acuity                   | 20/40 or better                          | 4.20%                 | 31.60%            | 63.30%             | Reference                                  | <.001   | Reference                                  | <.001   |
|                                 | >20/40 - <20/200                         | 11.60%                | 24.50%            | 20.60%             | 5.59 (3.07 - 10.19)                        |         | 3.67 (1.78 - 7.59)                         |         |
|                                 | 20/200 or worse                          | 84.10%                | 43.90%            | 16.00%             | 36.15 (21.51 - 60.78)                      |         | 13.85 (7.23 - 26.53)                       |         |
| Duration of uveitis at baseline | <6 months                                | 19.00%                | 36.70%            | 35.40%             | Reference                                  | <.001   | Reference                                  | 0.21    |
|                                 | 6 months to 2 years                      | 11.10%                | 13.80%            | 22.00%             | 0.82 (0.48 - 1.38)                         |         | 1.04 (0.52 - 2.10)                         |         |
|                                 | 2 to 5 years                             | 11.10%                | 13.80%            | 18.10%             | 0.92 (0.54 - 1.59)                         |         | 1.06 (0.50 - 2.23)                         |         |
|                                 | Greater than 5 years                     | 58.70%                | 35.70%            | 24.60%             | 3.30 (2.28 - 4.78)                         |         | 1.71 (0.90 - 3.24)                         |         |
| Prior Cataract Surgery by Type  | None                                     | 37.60%                | 65.30%            | 87.60%             | Reference                                  | <.001   | Reference                                  | <.001   |
|                                 | Phacoemulsification                      | 1.10%                 | 4.60%             | 2.30%              | 1.88 (0.75 - 4.74)                         |         | 2.39 (0.76 - 7.49)                         |         |
|                                 | Extracapsular cataract extraction (ECCE) | 10.10%                | 8.20%             | 2.60%              | 7.01 (4.03 - 12.20)                        |         | 4.75 (2.10 - 10.78)                        |         |
|                                 | Intracapsular cataract extraction (ICCE) | 5.80%                 | 2.00%             | 0.50%              | 24.01 (9.69 - 59.47)                       |         | 36.48 (12.09 - 110.06)                     |         |
|                                 | Pars plana lensectomy                    | 7.40%                 | 1.50%             | 0.70%              | 15.10 (7.17 - 31.82)                       |         | 8.78 (3.38 - 22.86)                        |         |
|                                 | Unknown                                  | 38.10%                | 18.40%            | 6.30%              | 10.66 (7.36 - 15.43)                       |         | 9.51 (5.44 - 16.60)                        |         |
| Prior Glaucoma Surgery          | No                                       | 84.70%                | 86.20%            | 97.00%             | Reference                                  | <.001   | Reference                                  | <0.001  |
|                                 | Yes                                      | 15.30%                | 13.80%            | 3.00%              | 4.47 (2.74 - 7.29)                         |         | 2.61 (1.50 - 4.56)                         |         |
| Prior Trabeculectomy            | No                                       | 88.90%                | 89.70%            | 98.10%             | Reference                                  | <.001   | Reference                                  | 0.7     |
|                                 | Yes                                      | 11.10%                | 10.30%            | 1.90%              | 5.68 (3.56 - 9.07)                         |         | 1.24 (0.42 - 3.60)                         |         |

|                                                |                          |                              |        |        |                     |                      |                     |                    |       |
|------------------------------------------------|--------------------------|------------------------------|--------|--------|---------------------|----------------------|---------------------|--------------------|-------|
| Prior Tube-Shunt Surgery                       | No                       | 94.70%                       | 95.90% | 99.40% | Reference           | <.001                | Reference           | 0.28               |       |
|                                                | Yes                      | 5.30%                        | 4.10%  | 0.60%  | 5.83 (2.13 - 15.93) |                      | 1.72 (0.64 - 4.63)  |                    |       |
| Prior Pars Plana Vitrectomy                    | No                       | 76.20%                       | 90.80% | 97.10% | Reference           | <.001                | Reference           | <0.001             |       |
|                                                | Yes                      | 23.80%                       | 9.20%  | 2.90%  | 6.43 (4.22 - 9.78)  |                      | 2.76 (1.57 - 4.84)  |                    |       |
| Prior Retinal Detachment Surgery               | No                       | 93.10%                       | 96.90% | 99.10% | Reference           | <.001                | Reference           | 0.62               |       |
|                                                | Yes                      | 6.90%                        | 3.10%  | 0.90%  | 5.48 (2.54 - 11.86) |                      | 1.28 (0.48 - 3.45)  |                    |       |
| Signs of Inflammatory Activity at Presentation | Anterior chamber cells   | Quiet                        | 56.10% | 32.50% | 56.20%              | Reference            | 0.32                | Reference          | 0.21  |
|                                                |                          | 0.5+                         | 15.60% | 14.70% | 16.50%              | 0.88 (0.57 - 1.37)   |                     | 0.96 (0.57 - 1.63) |       |
|                                                |                          | 1+                           | 12.10% | 20.40% | 12.40%              | 0.88 (0.53 - 1.46)   |                     | 0.80 (0.43 - 1.52) |       |
|                                                |                          | 2+                           | 8.70%  | 18.30% | 9.70%               | 1.16 (0.72 - 1.86)   |                     | 1.22 (0.64 - 2.33) |       |
|                                                |                          | 3+ or worse                  | 7.50%  | 14.10% | 5.20%               | 1.64 (0.96 - 2.80)   |                     | 2.15 (1.04 - 4.44) |       |
|                                                | Vitreous cells           | Quiet                        | 58.70% | 53.60% | 57.60%              | Reference            | 0.008               | Reference          | 0.03  |
|                                                |                          | 0.5+                         | 11.90% | 9.80%  | 12.70%              | 0.79 (0.42 - 1.49)   |                     | 0.87 (0.45 - 1.69) |       |
|                                                |                          | 1+                           | 7.90%  | 16.30% | 15.30%              | 0.62 (0.35 - 1.09)   |                     | 1.09 (0.53 - 2.24) |       |
|                                                |                          | 2+                           | 12.70% | 13.10% | 10.90%              | 1.37 (0.81 - 2.30)   |                     | 2.12 (1.14 - 3.92) |       |
|                                                |                          | 3+ or worse                  | 8.70%  | 7.20%  | 3.40%               | 2.28 (1.26 - 4.12)   |                     | 2.46 (1.15 - 5.30) |       |
|                                                | Vitreous haze            | Quiet                        | 70.90% | 74.30% | 82.90%              | Reference            | <.001               | Reference          | 0.02  |
|                                                |                          | 1+                           | 17.90% | 13.50% | 10.90%              | 1.86 (1.15 - 3.03)   |                     | 2.22 (1.31 - 3.74) |       |
|                                                |                          | 2+                           | 6.00%  | 8.80%  | 4.40%               | 1.87 (0.95 - 3.67)   |                     | 1.44 (0.59 - 3.52) |       |
|                                                |                          | 3+ or worse                  | 5.10%  | 3.40%  | 1.80%               | 3.69 (1.67 - 8.14)   |                     | 0.49 (0.06 - 3.74) |       |
|                                                | Keratic precipitates     | No                           | 85.50% | 70.50% | 84.20%              | Reference            | 0.99                | Reference          | 0.44  |
|                                                |                          | Yes                          | 14.50% | 29.50% | 15.80%              | 1.00 (0.60 - 1.66)   |                     | 0.77 (0.39 - 1.52) |       |
|                                                | Structural complications | Any†                         | 67.80% | 62.20% | 43.00%              | 2.28 (1.66 - 3.13)   | <.001               | 1.60 (1.01 - 2.54) | 0.04  |
|                                                |                          | Band keratopathy             | 33.10% | 19.10% | 4.10%               | 10.71 (7.11 - 16.14) | <.001               | 3.64 (1.69 - 7.84) | 0.001 |
|                                                |                          | Peripheral anterior synechia | 15.30% | 8.30%  | 3.60%               | 4.19 (2.54 - 6.89)   | <.001               | 1.63 (0.87 - 3.03) | 0.12  |
|                                                |                          | Posterior synechia           | 33.30% | 30.70% | 18.00%              | 1.84 (1.31 - 2.58)   | <.001               | 1.81 (1.14 - 2.87) | 0.01  |
| Exudative detachment                           |                          | 16.50%                       | 3.60%  | 1.30%  | 8.81 (4.61 - 16.84) | <.001                | 6.97 (3.40 - 14.27) | <.001              |       |

† Any systemic disease includes those in the table as well as Behçet's disease. Any structural complication includes those in the table as well as choroidal neovascularization, epiretinal membrane, exudative detachment, macular edema and retinal neovascularization

‡ Vitreous cells and haze are never adjusted by anterior chamber cells

\* Adjusting for cataract surgery by type, prior glaucoma surgery, pars plana vitrectomy, retinal detachment surgery, sarcoidosis, juvenile idiopathic arthritis, type of uveitis, age, race, hypertension, diabetes, duration of uveitis at baseline, anterior chamber cells and exudative detachment

§ Hyperlipidemia, smoking status, epiretinal membrane, macular edema, and retinal vascular sheathing are excluded from the table because they were never found to be significant at  $p < 0.10$ . Active lesions in choroid/retina, snowballs, snowbanking, Behçet's disease, choroidal neovascularization and retinal neovascularization are excluded from the table because people with these characteristics had fewer than 5 hypotony events
