# Supplementary material
Source: PubMed Central journal article supplement (PMC3475753)
Supplement: NIHMS380917-supplement-02.pdf [file NIHMS380917-supplement-02.pdf]

**Table 3. Characteristics of eyes with uveitis and hypotony (<8 mmHg vs 8+ mmHg) at presentation**

|                                 |                                    | Intraocular Pressures |                      |                    | Univariate                                    |             | Multivariate*                                 |         |
|---------------------------------|------------------------------------|-----------------------|----------------------|--------------------|-----------------------------------------------|-------------|-----------------------------------------------|---------|
|                                 |                                    | <5 mmHg<br>n=189      | 5-7<br>mmHg<br>n=196 | >7 mmHg<br>n=10734 | Odds Ratio<br>(95%<br>Confidence<br>Interval) | p-<br>value | Odds Ratio<br>(95%<br>Confidence<br>Interval) | p-value |
| Age                             | <18                                | 28.30%                | 27.80%               | 16.20%             | 1.91 (1.34 - 2.72)                            | <.001       | 1.15 (0.69 - 1.93)                            | 0.53    |
|                                 | 18-25                              | 10.90%                | 12.90%               | 12.40%             | 1.06 (0.68 - 1.64)                            |             | 0.88 (0.50 - 1.56)                            |         |
|                                 | 26-35                              | 17.90%                | 19.10%               | 20.90%             | Reference                                     |             | Reference                                     |         |
|                                 | 36-45                              | 19.00%                | 18.60%               | 19.60%             | 1.03 (0.70 - 1.51)                            |             | 1.07 (0.67 - 1.69)                            |         |
|                                 | 46-55                              | 9.80%                 | 11.30%               | 14.80%             | 0.78 (0.50 - 1.20)                            |             | 0.73 (0.42 - 1.30)                            |         |
|                                 | 56-65                              | 3.80%                 | 3.60%                | 8.60%              | 0.49 (0.26 - 0.94)                            |             | 0.61 (0.30 - 1.26)                            |         |
|                                 | >65                                | 10.30%                | 6.70%                | 7.50%              | 1.32 (0.83 - 2.10)                            |             | 0.67 (0.34 - 1.33)                            |         |
| Gender                          | Female                             | 67.20%                | 60.70%               | 64.10%             | Reference                                     | 0.8287      | Reference                                     | 0.1     |
|                                 | Male                               | 32.80%                | 39.30%               | 35.90%             | 1.03 (0.81 - 1.31)                            |             | 1.30 (0.96 - 1.77)                            |         |
| Race                            | White                              | 56.60%                | 56.10%               | 72.10%             | Reference                                     | <.001       | Reference                                     | 0.11    |
|                                 | African-derived                    | 32.30%                | 28.10%               | 15.70%             | 2.40 (1.83 - 3.14)                            |             | 1.35 (0.89 - 2.06)                            |         |
|                                 | Other                              | 11.10%                | 15.80%               | 12.20%             | 1.41 (0.98 - 2.01)                            |             | 1.54 (0.98 - 2.42)                            |         |
| Contralateral uveitis           | Yes                                | 89.40%                | 78.10%               | 82.60%             | Reference                                     | 0.5944      | Reference                                     | 0.35    |
|                                 | No                                 | 10.60%                | 21.90%               | 17.40%             | 0.93 (0.70 - 1.23)                            |             | 1.20 (0.82 - 1.74)                            |         |
| Hypertension                    | No                                 | 73.00%                | 84.20%               | 82.80%             | Reference                                     | 0.0954      | Reference                                     | 0.97    |
|                                 | Yes                                | 27.00%                | 15.80%               | 17.20%             | 1.28 (0.96 - 1.70)                            |             | 0.99 (0.66 - 1.50)                            |         |
| Diabetes                        | No                                 | 89.40%                | 94.90%               | 94.80%             | Reference                                     | 0.051       | Reference                                     | 0.83    |
|                                 | Yes                                | 10.60%                | 5.10%                | 5.20%              | 1.54 (1.00 - 2.38)                            |             | 1.07 (0.57 - 2.01)                            |         |
| Systemic diseases               | Any†                               | 36.50%                | 34.70%               | 24.10%             | 1.72 (1.35 - 2.20)                            | <.001       | 1.15 (0.72 - 1.85)                            | 0.56    |
|                                 | HLA-B27 and/or spondyloarthropathy | 6.30%                 | 12.20%               | 10.40%             | 0.94 (0.65 - 1.36)                            | 0.7307      | 1.34 (0.84 - 2.13)                            | 0.22    |
|                                 | Juvenile idiopathic arthritis      | 18.00%                | 15.30%               | 5.00%              | 3.77 (2.71 - 5.23)                            | <.001       | 1.91 (1.09 - 3.33)                            | 0.02    |
|                                 | Sarcoidosis                        | 11.60%                | 9.20%                | 7.10%              | 1.48 (0.98 - 2.23)                            | 0.0602      | 1.82 (1.08 - 3.07)                            | 0.03    |
| Type of uveitis                 | Anterior Uveitis                   | 56.60%                | 59.70%               | 54.10%             | Reference                                     | <.001       | Reference                                     | 0.053   |
|                                 | Intermediate Uveitis               | 2.60%                 | 12.80%               | 17.30%             | 0.43 (0.28 - 0.66)                            |             | 0.59 (0.34 - 1.01)                            |         |
|                                 | Panuveitis                         | 34.40%                | 20.90%               | 11.60%             | 2.18 (1.65 - 2.88)                            |             | 1.07 (0.70 - 1.62)                            |         |
|                                 | Posterior Uveitis                  | 6.30%                 | 6.60%                | 17.00%             | 0.35 (0.22 - 0.57)                            |             | 0.54 (0.31 - 0.95)                            |         |
| Visual Acuity                   | 20/40 or better                    | 4.20%                 | 31.60%               | 63.30%             | Reference                                     | <.001       | Reference                                     | <.001   |
|                                 | >20/40 - <20/200                   | 11.60%                | 24.50%               | 20.60%             | 2.85 (2.04 - 3.98)                            |             | 2.13 (1.43 - 3.17)                            |         |
|                                 | 20/200 or worse                    | 84.10%                | 43.90%               | 16.00%             | 11.65 (8.73 - 15.54)                          |             | 4.69 (3.21 - 6.85)                            |         |
| Duration of uveitis at baseline | <6 months                          | 19.00%                | 36.70%               | 35.40%             | Reference                                     | <.001       | Reference                                     | 0.16    |
|                                 | 6 months to 2 years                | 11.10%                | 13.80%               | 22.00%             | 0.73 (0.50 - 1.07)                            |             | 0.80 (0.50 - 1.29)                            |         |

|                                                |                                   |             |        |        |                      |                    |                      |                    |       |
|------------------------------------------------|-----------------------------------|-------------|--------|--------|----------------------|--------------------|----------------------|--------------------|-------|
|                                                | 2 to 5 years                      | 11.10%      | 13.80% | 18.10% | 0.85 (0.58 - 1.26)   |                    | 0.79 (0.48 - 1.30)   |                    |       |
|                                                | Greater than 5 years              | 58.70%      | 35.70% | 24.60% | 2.34 (1.77 - 3.10)   |                    | 1.23 (0.82 - 1.86)   |                    |       |
| Prior Cataract Surgery by Type                 | None                              | 37.60%      | 65.30% | 87.60% | Reference            | <.001              | Reference            | <.001              |       |
|                                                | Phacoemulsification               | 1.10%       | 4.60%  | 2.30%  | 2.06 (1.13 - 3.76)   |                    | 2.35 (1.11 - 4.95)   |                    |       |
|                                                | Extracapsular cataract extraction | 10.10%      | 8.20%  | 2.60%  | 5.13 (3.33 - 7.92)   |                    | 3.76 (2.06 - 6.85)   |                    |       |
|                                                | Intracapsular cataract extraction | 5.80%       | 2.00%  | 0.50%  | 11.60 (5.03 - 26.76) |                    | 12.61 (4.43 - 35.92) |                    |       |
|                                                | Pars plana lensectomy             | 7.40%       | 1.50%  | 0.70%  | 7.83 (4.03 - 15.18)  |                    | 3.78 (1.55 - 9.22)   |                    |       |
|                                                | Unknown                           | 38.10%      | 18.40% | 6.30%  | 6.63 (4.94 - 8.90)   |                    | 6.25 (4.15 - 9.39)   |                    |       |
| Prior Glaucoma Surgery                         | No                                | 84.70%      | 86.20% | 97.00% | Reference            | <.001              | Reference            | <.001              |       |
|                                                | Yes                               | 15.30%      | 13.80% | 3.00%  | 4.20 (2.83 - 6.23)   |                    | 2.71 (1.74 - 4.22)   |                    |       |
| Prior Trabeculectomy                           | No                                | 88.90%      | 89.70% | 98.10% | Reference            | <.001              | Reference            | 0.44               |       |
|                                                | Yes                               | 11.10%      | 10.30% | 1.90%  | 5.40 (3.54 - 8.24)   |                    | 1.40 (0.60 - 3.31)   |                    |       |
| Prior Tube-Shunt Surgery                       | No                                | 94.70%      | 95.90% | 99.40% | Reference            | 0.0002             | Reference            | 0.56               |       |
|                                                | Yes                               | 5.30%       | 4.10%  | 0.60%  | 5.10 (2.19 - 11.90)  |                    | 1.29 (0.55 - 3.03)   |                    |       |
| Prior Pars Plana Vitrectomy                    | No                                | 76.20%      | 90.80% | 97.10% | Reference            | <.001              | Reference            | <.001              |       |
|                                                | Yes                               | 23.80%      | 9.20%  | 2.90%  | 4.97 (3.50 - 7.08)   |                    | 2.56 (1.58 - 4.14)   |                    |       |
| Prior Retinal Detachment Surgery               | No                                | 93.10%      | 96.90% | 99.10% | Reference            | 0.0001             | Reference            | 0.66               |       |
|                                                | Yes                               | 6.90%       | 3.10%  | 0.90%  | 4.04 (1.99 - 8.21)   |                    | 1.22 (0.50 - 2.98)   |                    |       |
| Signs of Inflammatory Activity at Presentation | Anterior chamber cells            | Quiet       | 56.10% | 32.50% | 56.20%               | Reference          | <.001                | Reference          | <.001 |
|                                                |                                   | 0.5+        | 15.60% | 14.70% | 16.50%               | 0.97 (0.69 - 1.38) |                      | 1.08 (0.72 - 1.62) |       |
|                                                |                                   | 1+          | 12.10% | 20.40% | 12.40%               | 1.49 (1.07 - 2.08) |                      | 1.30 (0.85 - 2.00) |       |
|                                                |                                   | 2+          | 8.70%  | 18.30% | 9.70%                | 1.65 (1.16 - 2.35) |                      | 1.97 (1.25 - 3.10) |       |
|                                                |                                   | 3+ or worse | 7.50%  | 14.10% | 5.20%                | 2.49 (1.72 - 3.62) |                      | 3.08 (1.89 - 5.04) |       |
|                                                | Vitreous cells                    | Quiet       | 58.70% | 53.60% | 57.60%               | Reference          | 0.0019               | Reference          | 0.004 |
|                                                |                                   | 0.5+        | 11.90% | 9.80%  | 12.70%               | 0.88 (0.57 - 1.34) |                      | 0.99 (0.61 - 1.59) |       |
|                                                |                                   | 1+          | 7.90%  | 16.30% | 15.30%               | 0.93 (0.65 - 1.35) |                      | 1.39 (0.91 - 2.13) |       |
|                                                |                                   | 2+          | 12.70% | 13.10% | 10.90%               | 1.12 (0.73 - 1.71) |                      | 1.53 (0.94 - 2.50) |       |
|                                                |                                   | 3+ or worse | 8.70%  | 7.20%  | 3.40%                | 2.35 (1.51 - 3.67) |                      | 2.91 (1.65 - 5.15) |       |
|                                                | Vitreous haze                     | Quiet       | 70.90% | 74.30% | 82.90%               | Reference          | 0.0004               | Reference          | 0.03  |
|                                                |                                   | 1+          | 17.90% | 13.50% | 10.90%               | 1.54 (1.05 - 2.26) |                      | 1.59 (1.03 - 2.45) |       |
|                                                |                                   | 2+          | 6.00%  | 8.80%  | 4.40%                | 2.04 (1.24 - 3.36) |                      | 2.13 (1.17 - 3.86) |       |
|                                                |                                   | 3+ or worse | 5.10%  | 3.40%  | 1.80%                | 2.72 (1.44 - 5.12) |                      | 1.08 (0.31 - 3.77) |       |
|                                                | Keratic precipitates              | No          | 85.50% | 70.50% | 84.20%               | Reference          | 0.0132               | Reference          | 0.69  |
|                                                |                                   | Yes         | 14.50% | 29.50% | 15.80%               | 1.49 (1.09 - 2.04) |                      | 0.91 (0.59 - 1.42) |       |
|                                                | Structural complications          | Any†        | 67.80% | 62.20% | 43.00%               | 2.09 (1.66 - 2.62) | <.001                | 1.50 (1.09 - 2.05) | 0.01  |

|  |                              |        |        |        |                     |       |                    |       |
|--|------------------------------|--------|--------|--------|---------------------|-------|--------------------|-------|
|  | Band keratopathy             | 33.10% | 19.10% | 4.10%  | 7.71 (5.55 - 10.72) | <.001 | 2.49 (1.36 - 4.56) | 0.003 |
|  | Peripheral anterior synechia | 15.30% | 8.30%  | 3.60%  | 3.32 (2.19 - 5.04)  | <.001 | 1.52 (0.91 - 2.53) | 0.11  |
|  | Posterior synechia           | 33.30% | 30.70% | 18.00% | 1.89 (1.48 - 2.41)  | <.001 | 1.48 (1.05 - 2.09) | 0.03  |
|  | Exudative detachment         | 16.50% | 3.60%  | 1.30%  | 6.50 (3.83 - 11.04) | <.001 | 5.01 (2.74 - 9.13) | <.001 |

† Any systemic disease includes those in the table as well as Behçet's disease. Any structural complication includes those in the table as well as choroidal neovascularization, epiretinal membrane, exudative detachment, macular edema and retinal neovascularization

‡ Vitreous cells and haze are never adjusted by anterior chamber cells

\* Adjusting for cataract surgery by type, prior glaucoma surgery, pars plana vitrectomy, retinal detachment surgery, sarcoidosis, juvenile idiopathic arthritis, type of uveitis, age, race, hypertension, diabetes, duration of uveitis at baseline, anterior chamber cells and exudative detachment

§ Hyperlipidemia, smoking status, epiretinal membrane, macular edema, and retinal vascular sheathing are excluded from the table because they were never found to be significant at  $p < 0.10$ . Active lesions in choroid/retina, snowballs, snowbanking, Behçet's disease, choroidal neovascularization and retinal neovascularization are excluded from the table because people with these characteristics had fewer than 5 hypotony events
