# Supplementary material
Source: PubMed Central journal article supplement (PMC3475753)
Supplement: NIHMS380917-supplement-03.pdf [file NIHMS380917-supplement-03.pdf]

**Table 4: Hazard ratio for Intraocular Pressure <5mmHg, sustained for at least 30 days**

|                                     |                                  | Univariate<br>n=6,785<br>events=126 |                                              |             | Multivariate**<br>n=6,540<br>event=97 |                                              |             |
|-------------------------------------|----------------------------------|-------------------------------------|----------------------------------------------|-------------|---------------------------------------|----------------------------------------------|-------------|
|                                     |                                  | Events/<br>At Risk                  | Hazard Ratio<br>(95% Confidence<br>Interval) | p-<br>value | Events/<br>At Risk                    | Hazard Ratio<br>(95% Confidence<br>Interval) | p-<br>value |
| Age                                 | <18                              | 45/973                              | 4.97 (2.58 - 9.57)                           | <.001       | 36/933                                | 2.92 (1.20 - 7.10)                           | 0.15        |
|                                     | 18-25                            | 22/897                              | 2.50 (1.21 - 5.15)                           |             | 19/878                                | 2.27 (0.98 - 5.27)                           |             |
|                                     | 26-35                            | 15/1483                             | Reference                                    |             | 12/1458                               | Reference                                    |             |
|                                     | 36-45                            | 15/1300                             | 1.19 (0.53 - 2.65)                           |             | 11/1275                               | 0.99 (0.40 - 2.43)                           |             |
|                                     | 46-55                            | 13/983                              | 1.39 (0.63 - 3.08)                           |             | 9/963                                 | 1.00 (0.35 - 2.85)                           |             |
|                                     | 56-65                            | 6/556                               | 1.14 (0.39 - 3.35)                           |             | 5/548                                 | 0.79 (0.22 - 2.82)                           |             |
|                                     | >65                              | 7/497                               | 1.87 (0.69 - 5.07)                           |             | 5/485                                 | 0.84 (0.24 - 2.97)                           |             |
| Gender                              | Male                             | 34/2388                             | Reference                                    | 0.12        | 23/2305                               | Reference                                    | 0.49        |
|                                     | Female                           | 92/4397                             | 1.45 (0.91 - 2.30)                           |             | 74/4235                               | 1.22 (0.70 - 2.14)                           |             |
| Race                                | White                            | 73/4755                             | Reference                                    | 0.002       | 55/4629                               | Reference                                    | 0.74        |
|                                     | African-derived                  | 42/1208                             | 2.22 (1.42 - 3.46)                           |             | 32/1148                               | 1.25 (0.71 - 2.22)                           |             |
|                                     | Other                            | 11/822                              | 1.10 (0.52 - 2.30)                           |             | 10/763                                | 1.03 (0.49 - 2.14)                           |             |
| Contralateral uveitis               | No                               | 8/1170                              | Reference                                    | 0.02        | 8/1144                                | Reference                                    | 0.41        |
|                                     | Yes                              | 118/5615                            | 2.35 (1.14 - 4.87)                           |             | 89/5396                               | 1.39 (0.63 - 3.07)                           |             |
| Hypertension                        | No                               | 86/5547                             | Reference                                    | 0.006       | 70/5351                               | Reference                                    | 0.052       |
|                                     | Yes                              | 40/1238                             | 1.89 (1.20 - 2.97)                           |             | 27/1189                               | 2.04 (0.99 - 4.20)                           |             |
| Diabetes                            | No                               | 121/6398                            | Reference                                    | 0.37        | 95/6169                               | Reference                                    | 0.16        |
|                                     | Yes                              | 5/387                               | 0.66 (0.26 - 1.65)                           |             | 2/371                                 | 0.34 (0.08 - 1.52)                           |             |
| Systemic Diseases                   | Any†                             | 57/1846                             | 1.80 (1.20 - 2.72)                           | 0.005       | 43/1775                               | 0.79 (0.42 - 1.49)                           | 0.46        |
|                                     | HLA-B27 and/or spondyloarthritis | 16/801                              | 1.05 (0.58 - 1.88)                           | 0.88        | 12/784                                | 1.43 (0.61 - 3.32)                           | 0.41        |
|                                     | Juvenile idiopathic arthritis    | 33/329                              | 6.13 (3.83 - 9.81)                           | <.001       | 25/297                                | 2.04 (0.79 - 5.31)                           | 0.14        |
|                                     | Sarcoidosis                      | 14/576                              | 1.05 (0.53 - 2.07)                           | 0.88        | 11/555                                | 0.97 (0.38 - 2.48)                           | 0.96        |
| Type of Uveitis                     | Anterior Uveitis                 | 74/3609                             | Reference                                    | <.001       | 61/3459                               | Reference                                    | <.001       |
|                                     | Intermediate Uveitis             | 6/1197                              | 0.20 (0.07 - 0.58)                           |             | 4/1169                                | 0.17 (0.05 - 0.56)                           |             |
|                                     | Posterior Uveitis                | 3/1112                              | 0.10 (0.03 - 0.31)                           |             | 2/1087                                | 0.11 (0.03 - 0.45)                           |             |
|                                     | Panuveitis                       | 43/867                              | 1.93 (1.24 - 3.01)                           |             | 30/825                                | 1.25 (0.67 - 2.35)                           |             |
| Duration of uveitis at presentation | <6 months                        | 18/2749                             | Reference                                    | <.001       | 10/2613                               | Reference                                    | 0.002       |
|                                     | 6 months to 2 years              | 15/1401                             | 1.46 (0.67 - 3.17)                           |             | 14/1382                               | 1.52 (0.59 - 3.94)                           |             |
|                                     | 2 to 5 years                     | 27/1134                             | 3.36 (1.68 - 6.69)                           |             | 26/1112                               | 4.53 (1.94 - 10.61)                          |             |
|                                     | Greater than 5 years             | 66/1501                             | 6.13 (3.33 - 11.26)                          |             | 47/1433                               | 3.08 (1.30 - 7.31)                           |             |
| Prior Cataract Surgery by Type      | None                             | 32/*                                | Reference                                    | <.001       | 19/*                                  | Reference                                    | <.001       |
|                                     | Phacoemulsification              | 13/*                                | 4.21 (2.15 - 8.27)                           |             | 13/*                                  | 4.87 (2.25 - 10.55)                          |             |
|                                     | Extracapsular cataract surgery   | 17/*                                | 8.00 (4.34 - 14.73)                          |             | 16/*                                  | 6.50 (3.14 - 13.45)                          |             |
|                                     | Intracapsular cataract surgery   | 11/*                                | 22.20 (9.32 -                                |             | 8/*                                   | 12.19 (3.78 -                                |             |

|                                  |                          |                              |                       |                      |       |                     |                     |       |
|----------------------------------|--------------------------|------------------------------|-----------------------|----------------------|-------|---------------------|---------------------|-------|
|                                  |                          |                              | 52.89)                |                      |       | 39.30)              |                     |       |
|                                  | Pars plana lensectomy    | 19/*                         | 25.63 (13.86 - 47.40) |                      | 18/*  | 8.51 (3.12 - 23.21) |                     |       |
|                                  | Unknown                  | 34/*                         | 13.98 (8.10 - 24.13)  |                      | 23/*  | 7.28 (3.31 - 16.00) |                     |       |
| Prior Pars Plana Vitrectomy      | No                       | 89/*                         | Reference             | <.001                | 63/*  | Reference           | 0.008               |       |
|                                  | Yes                      | 37/*                         | 5.58 (3.61 - 8.62)    |                      | 34/*  | 2.03 (1.21 - 3.42)  |                     |       |
| Prior Retinal Detachment Surgery | No                       | 118/*                        | Reference             | <.001                | 91/*  | Reference           | 0.88                |       |
|                                  | Yes                      | 8/*                          | 4.87 (2.24 - 10.59)   |                      | 6/*   | 0.92 (0.29 - 2.89)  |                     |       |
| Signs of Inflammatory Activity   | Anterior chamber cells   | Quiet                        | 72/*                  | Reference            | 0.03  | 58/*                | Reference           | 0.45  |
|                                  |                          | 0.5+                         | 26/*                  | 1.94 (1.20 - 3.14)   |       | 19/*                | 0.86 (0.46 - 1.58)  |       |
|                                  |                          | 1+                           | 14/*                  | 1.76 (0.93 - 3.35)   |       | 13/*                | 1.24 (0.63 - 2.46)  |       |
|                                  |                          | 2+                           | 4/*                   | 0.78 (0.28 - 2.14)   |       | 3/*                 | 0.31 (0.08 - 1.14)  |       |
|                                  |                          | 3+ or worse                  | 5/*                   | 1.87 (0.76 - 4.63)   |       | 4/*                 | 0.97 (0.32 - 2.94)  |       |
|                                  | Vitreous cells           | Quiet                        | 74/*                  | Reference            | <.001 | 63/*                | Reference           | 0.005 |
|                                  |                          | 0.5+                         | 11/*                  | 1.02 (0.54 - 1.92)   |       | 10/*                | 0.97 (0.46 - 2.04)  |       |
|                                  |                          | 1+                           | 8/*                   | 0.80 (0.38 - 1.69)   |       | 7/*                 | 0.72 (0.27 - 1.90)  |       |
|                                  |                          | 2+                           | 7/*                   | 1.23 (0.55 - 2.75)   |       | 7/*                 | 1.61 (0.65 - 3.94)  |       |
|                                  |                          | 3+ or worse                  | 10/*                  | 6.07 (2.99 - 12.32)  |       | 6/*                 | 4.73 (2.08 - 10.76) |       |
|                                  | Vitreous haze            | Quiet                        | 75/*                  | Reference            | <.001 | 64/*                | Reference           | 0.006 |
|                                  |                          | 1+                           | 20/*                  | 2.97 (1.81 - 4.86)   |       | 19/*                | 2.48 (1.32 - 4.67)  |       |
|                                  |                          | 2+                           | 8/*                   | 4.65 (2.05 - 10.56)  |       | 8/*                 | 3.87 (1.60 - 9.32)  |       |
|                                  |                          | 3+ or worse                  | 5/*                   | 6.69 (2.29 - 19.58)  |       | 2/*                 | 1.32 (0.26 - 6.78)  |       |
|                                  | Keratic precipitates     | No                           | 104/*                 | Reference            | 0.18  | 80/*                | Reference           | 0.22  |
|                                  |                          | Yes                          | 14/*                  | 1.52 (0.83 - 2.78)   |       | 13/*                | 1.60 (0.75 - 3.42)  |       |
|                                  | Structural complications | Any†                         | 85/*                  | 2.65 (1.77 - 3.96)   | <.001 | 70/*                | 1.78 (1.06 - 2.99)  | 0.03  |
|                                  |                          | Band keratopathy             | 38/*                  | 12.24 (7.90 - 18.98) | <.001 | 29/*                | 3.14 (1.42 - 6.98)  | 0.005 |
|                                  |                          | Peripheral anterior synechia | 7/*                   | 3.38 (1.55 - 7.37)   | 0.002 | 5/*                 | 1.16 (0.42 - 3.14)  | 0.78  |
|                                  |                          | Posterior synechia           | 31/*                  | 1.88 (1.22 - 2.89)   | 0.005 | 23/*                | 2.05 (1.21 - 3.45)  | 0.007 |
| Exudative detachment             |                          | 9/*                          | 14.15 (6.77 - 29.55)  | <.001                | 9/*   | 5.25 (1.86 - 14.80) | 0.002               |       |

† Any systemic disease includes those in the table as well as Behçet's disease. Any structural complication includes those in the table as well as choroidal neovascularization, epiretinal membrane, exudative detachment, macular edema and retinal neovascularization

\* The number at risk for time-varying characteristics changes over followup, and is therefore not reported as a number of patients

\*\* Adjusting for age, race, hypertension, juvenile idiopathic arthritis, systemic diseases†, type of uveitis, presence of contralateral uveitis, duration of uveitis at presentation, prior cataract surgery by type, prior pars plana vitrectomy, prior retinal detachment surgery, anterior chamber cells and presence of exudative retinal detachment. However, ‡ Vitreous cells and haze are never adjusted by anterior chamber cells

§ Hyperlipidemia, smoking status, epiretinal membrane, and macular edema were studied but are not included in the table because they were never found to be significant at  $p < 0.10$ . Retinal vascular sheathing, presence of active lesions in choroid/retina, snowballs, snowbanking, Behçes Disease, choroidal neovascularization and retinal neovascularization are excluded from the table because eyes with these characteristics had fewer than 5 hypotony events, and there was no suggestion of a protective pattern.
